# Supplementary material
Source: HighWire-hosted journal article supplement (https://stke.sciencemag.org/content/suppl/2009/04/24/2.68.ra18)
Supplement: 2000188_SM.pdf [file 2000188_SM.pdf]

Supplementary Materials for  
**Ligand Binding to LRP1 Transactivates Trk Receptors by a Src Family  
Kinase-Dependent Pathway**

Yang Shi, Elisabetta Mantuano, Gen Inoue, W. Marie Campana, Steven L. Gonias\*

\*To whom correspondence should be addressed. E-mail: sgonias@ucsd.edu

Published 28 April 2009, *Sci. Signal.* **2**, ra18 (2009)

DOI: 10.1126/scisignal.2000188

**This PDF file includes:**

Fig. S1. LRP1 does not immunoprecipitate with Trk receptors.

**fig. S1**

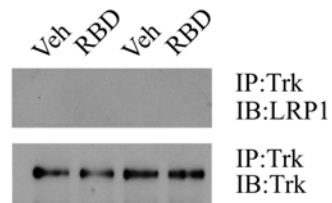

**fig. S1. LRP1 does not immunoprecipitate with Trk receptors.** PC12 cells were treated with the  $\alpha_2$ M RBD (100 nM) or with vehicle. Cell extracts were immunoprecipitated with a Trk receptor antibody and immunoblotted for the LRP1  $\beta$ -chain (antibody 11H4) or Trk receptors.
